# Supplementary material for: Psychometric evaluation of the Disabilities of the Arm, Shoulder and Hand (DASH) with Dupuytren’s contracture: validity evidence using Rasch modeling
Source: PubMed Central journal article supplement (PMC4228176; doi:10.1186/1471-2474-15-361), 2014-10-30

Scatterplot of baseline versus post-intervention difficulty estimates

3-6- and 12-months post-intervention difficulty estimates

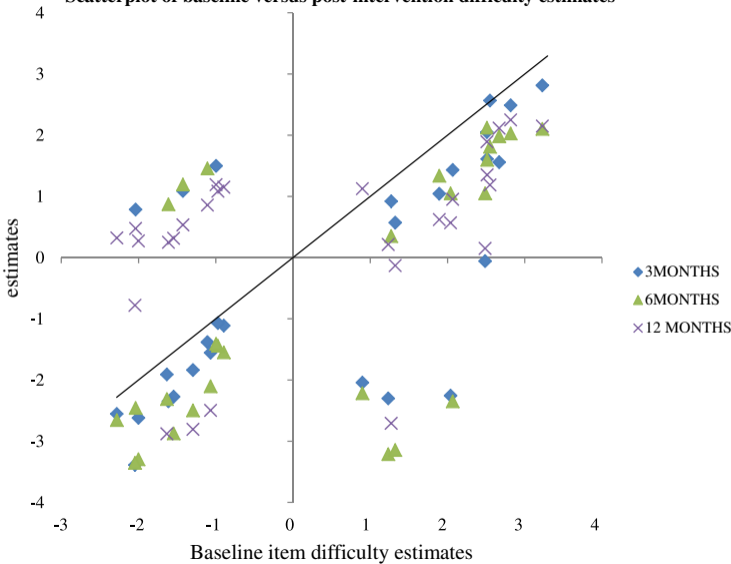

Supplement: 12891_2014_2298_MOESM4_ESM.pdf [file 12891_2014_2298_MOESM4_ESM.pdf]
